# Supplementary material for: Fabrication of hollow nanorod electrodes based on RuO2//Fe2O3 for an asymmetric supercapacitor
Source: Royal Society of Chemistry journal article supplement (doi:10.1039/c8dt00740c), 2018-01-01
Supplement: c8dt00740c1.pdf [file c8dt00740c1.pdf]

*Supporting information*

## Fabrication of hollow nanorod electrode based on $\text{RuO}_2//\text{Fe}_2\text{O}_3$ for asymmetric supercapacitor

*Qiufan Wang, Xiao Liang, Yun Ma, Daohong Zhang,\**

Key Laboratory of Catalysis and Materials Science of the State Ethnic Affairs Commission and Ministry of Education, South-Central University for Nationalities, Wuhan, Hubei Province, 430074, P. R. China. E-mail: zhangdh27@163.com

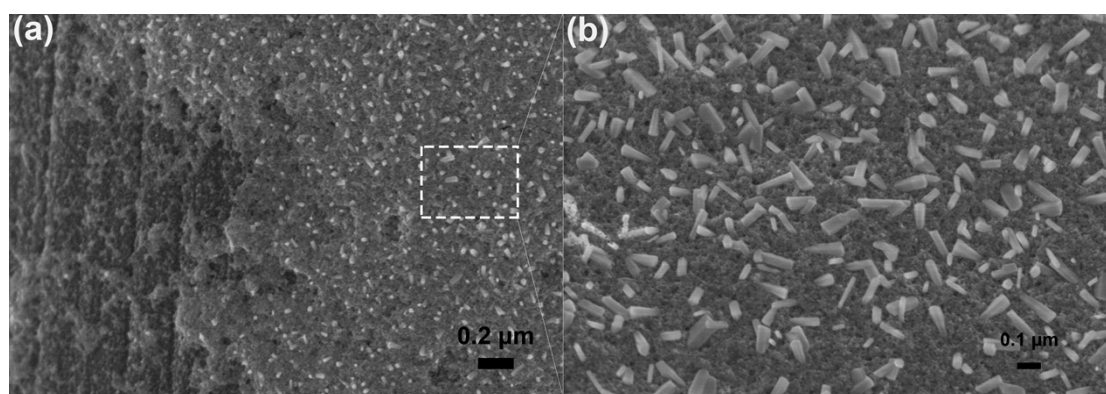

**Figure S1.** SEM of  $\text{RuO}_2$  electrode without ZnO as template.

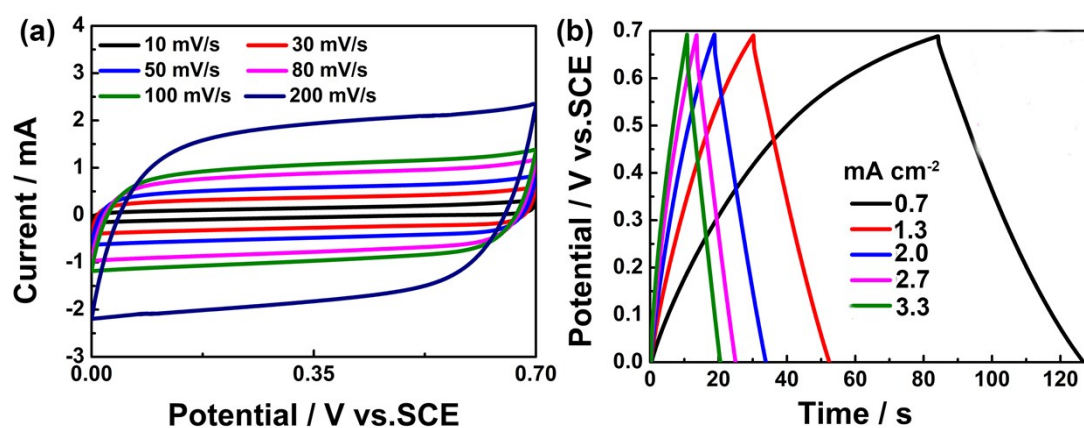

**Figure S2.** Electrochemical properties of  $\text{RuO}_2$  electrode without ZnO as template.

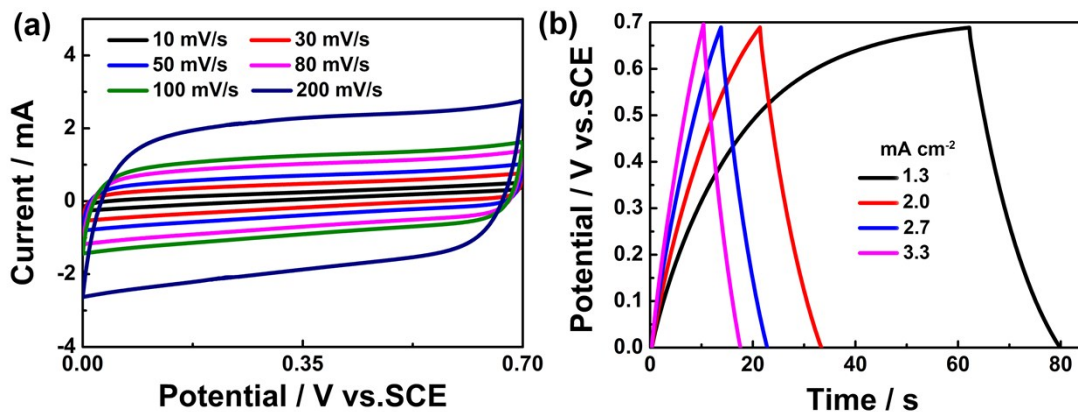

Figure S3. Electrochemical properties of RuO<sub>2</sub>-3 electrode.

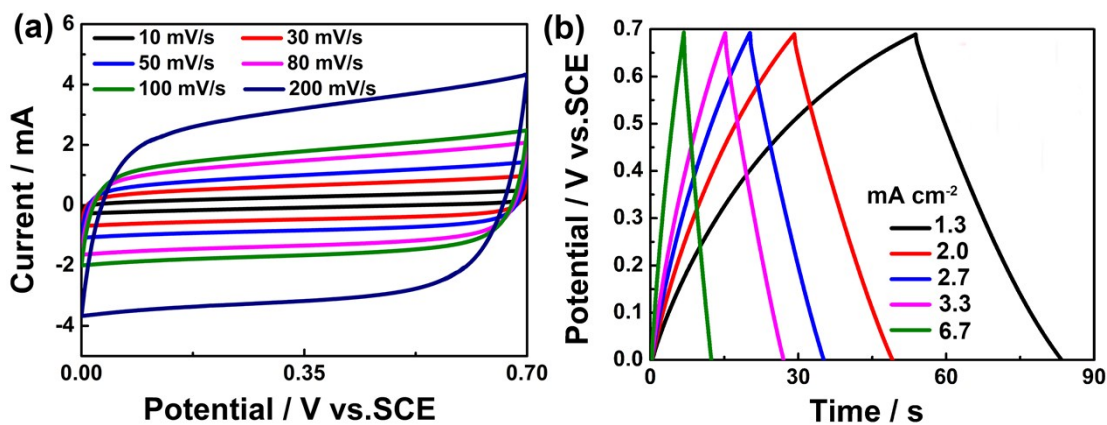

Figure S4. Electrochemical properties of RuO<sub>2</sub>-6 electrode.

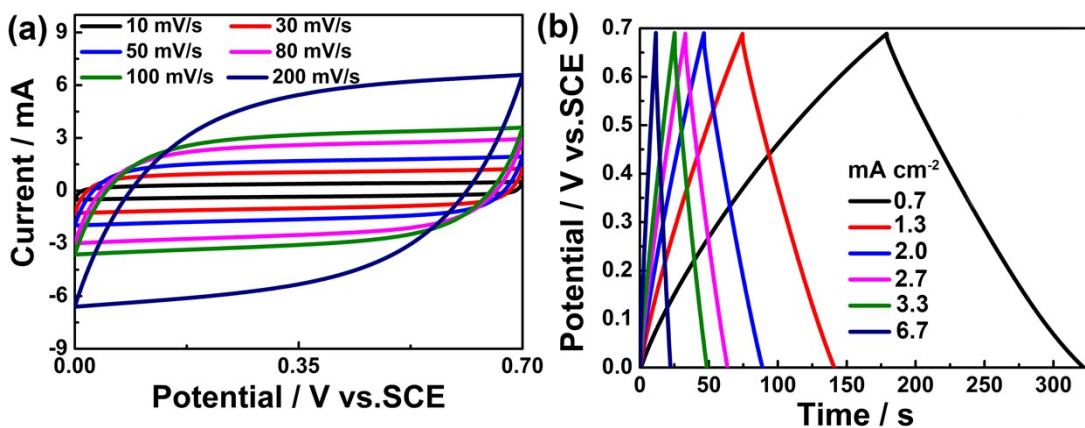

Figure S5. Electrochemical properties of RuO<sub>2</sub>-24 electrode.

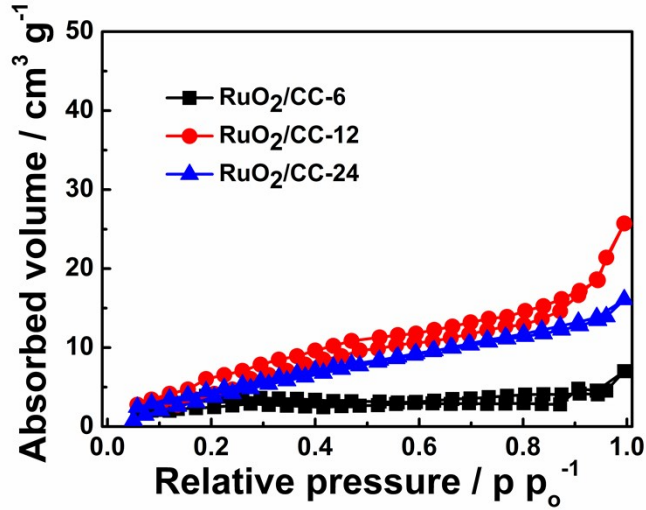

Figure S6. Nitrogen adsorption-desorption isotherms of RuO<sub>2</sub>.

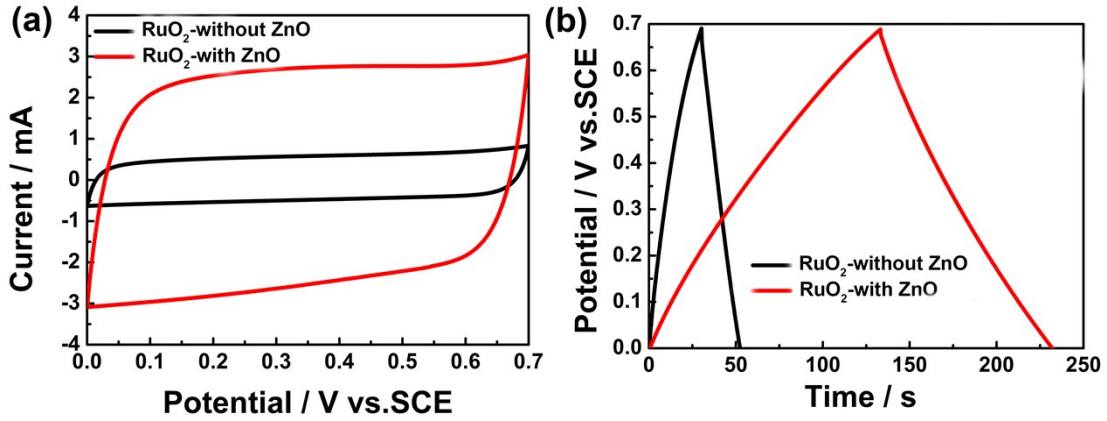

Figure S7. Electrochemical properties comparison of RuO<sub>2</sub> without ZnO as template and RuO<sub>2</sub>-12 electrode.

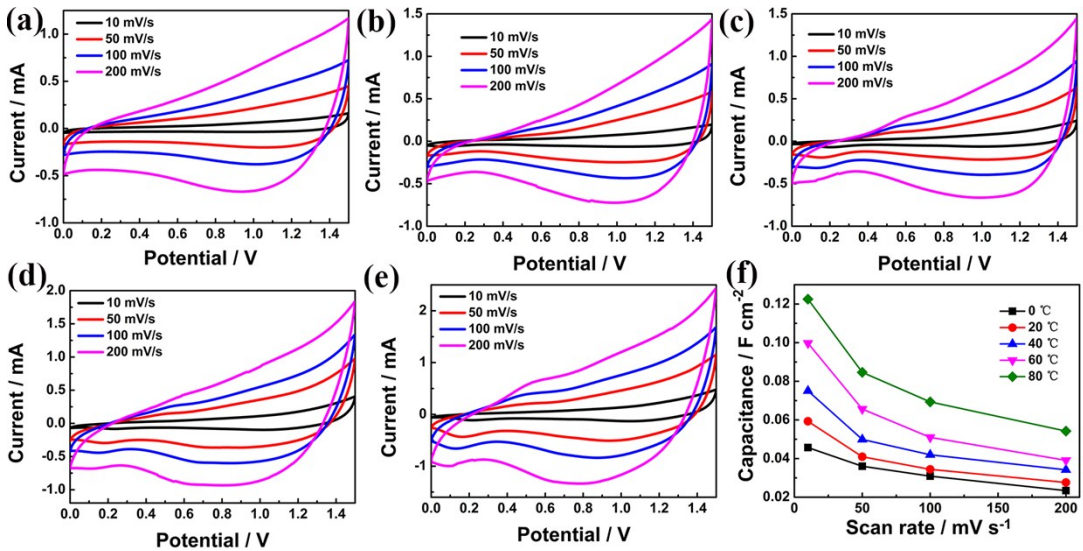

Figure S8. (a-e) CV curves for ASC device under 0, 20, 40, 60 and 80 °C, respectively. (f) Capacitance comparison at different temperatures based on CV curves.
